# Supplementary material
Source: Research Square preprint supplement (doi:10.21203/rs.3.rs-10090497/v1)
Supplement: Supplementary file 1 [file 83c1f228dbddc82fc65c1f98.xlsx]

## Sheet: Sheet1
Table 4. Clinical Timeline: Pediatric Massive Post-Traumatic Gluteal and Thigh Hematoma with FXIII Deficiency
Dec 2025 – Feb 2026 | 8-year-old female | Three hospital centers
Date	Event	Key Findings
INITIAL INJURY
Mid Dec 2025	Fall during long jump; buttocks strike concrete	Mild gluteal pain; limp. CT: right ischiopubic muscle contusion with hematoma.
HOSPITAL A — Regional Orthopedic Center (Jan 8 – Jan 19)
Jan 8, 2026	Admission	MRI: right adductor magnus & longus tear; hematoma ~100×65×45 mm.
Jan 9	Open hematoma evacuation + vessel exploration	Drain placed; temporary hemostasis achieved.
Jan 17	Hematoma re-accumulation after drain removal	Ultrasound: re-accumulation ~11.4×7.2 cm. Transferred to Hospital B (Jan 19).
HOSPITAL B — Tertiary University Hospital (Jan 19 – Jan 26)
Jan 19	Admission	Hb 111 g/L.
Jan 21–23	Imaging & labs: progressive enlargement + active hemorrhage	Hb 90 g/L.MRI (Jan 21): hematoma ~100×78×95 mm; multi-compartment involvement. CTA (Jan 23): hematoma ~116×69×100 mm, gas locules (infection), active contrast extravasation.
Jan 23	EMERGENCY: Selective arterial embolization	Right internal iliac artery branches + medial circumflex femoral artery.
Jan 24–25	Post-embolization deterioration	Hb 77 g/L ↓, WBC 13.06×10⁹/L. Mass enlarging; ipsilateral knee/calf pain. Transferred to our center (Jan 26).
OUR CENTER — Pediatric ICU (Jan 26 – Feb 26)
Jan 26	Admission: decompensated shock	T 39.2°C, HR 175 bpm, BP 89/58 mmHg. Shock index 1.97. Hb 53 g/L, CRP 56.2 mg/L. Thigh circumference 48 cm (L: 39 cm); forced knee flexion; reduced right lower leg sensation.
Jan 27–29	Imaging: massive hematoma confirmed	CTA/MRI: mixed-density hematoma 7.6×11.7×11.4 cm, posterior-medial thigh.
Feb 1	Key diagnosis: Factor XIII deficiency confirmed ★	FXIII antigen 20.3%. Explains recurrent hemorrhage and non-coagulating blood. Lupus anticoagulant also detected (DRVV-R 1.21).
Feb 3	Surgery: Super-selective embolization + open hematoma evacuation (GA)	Embolized: inferior gluteal artery ×4, medial circumflex femoral, deep femoral branches. Evacuated ~1000 mL; blood non-coagulating ("egg-drop-soup"). Intraop: rFVIIa ×2 units + RBC ×1 unit.
Feb 5–15	Recovery: Post-operative coagulopathy; component transfusion	Hb nadir 70 g/L; PLT nadir 59×10⁹/L; fibrinogen nadir 85–94 mg/dL. Serial transfusions (RBCs, FFP, cryoprecipitate, platelets).
Feb 26	Discharged	Hb 104–113 g/L, PLT 161–187×10⁹/L, CRP declining. Hematoma size decreased on ultrasound.
CT = computed tomography; CTA = CT angiography; FFP = fresh frozen plasma; rFVIIa = recombinant activated factor VII; GA = general anesthesia; RBC = red blood cells.
